# Supplementary material for: Circulating PD-L1 levels change during bevacizumab-based treatment in recurrent glioma
Source: Springer Nature journal article supplement (doi:10.1007/s00262-021-02951-2), 2021-05-06
Supplement: MOESM1 [file 19140266]

|                                                                           | IDH-wildtype<br>(n = 29) | IDH-mutated<br>(n = 6) |
|---------------------------------------------------------------------------|--------------------------|------------------------|
| <b>Gender</b>                                                             |                          |                        |
| - Male                                                                    | 22 (75.9%)               | 5 (83.3%)              |
| - Female                                                                  | 7 (24.1%)                | 1 (16.7%)              |
| <b>Age at first diagnosis<br/>(years)</b>                                 |                          |                        |
| - Median (range)                                                          | 51 (20 - 75)             | 30.5 (24 - 56)         |
| <b>WHO Grades</b>                                                         |                          |                        |
| - Grade II - III                                                          | 5 (17.2%)                | 5 (83.3%)              |
| - Grade IV                                                                | 24 (82.8%)               | 1 (16.7%)              |
| <b>MGMT promoter methylation<br/>status</b>                               |                          |                        |
| - methylated                                                              | 4 (13.8%)                | -                      |
| - unmethylated                                                            | 8 (27.6%)                | -                      |
| - unknown                                                                 | 17 (58.6%)               | 6 (100.0%)             |
| <b>Treatment</b>                                                          |                          |                        |
| - bevacizumab alone                                                       | 16 (55.2%)               | 2 (33.3%)              |
| - bevacizumab + alkylating<br>agent                                       | 6 (20.7%)                | 3 (50.0%)              |
| - bevacizumab + tyrosine<br>kinase inhibitor                              | 7 (24.1%)                | 1 (16.7%)              |
| <b>Bevacizumab dosage</b>                                                 |                          |                        |
| - 400 mg absolute                                                         | 16 (55.2%)               | 6 (80.0%)              |
| → corresponding to mg<br>bevacizumab per kg body<br>weight; median, range | 5.1 (4 - 8.2)            | 5.6 (4 - 6.7)          |
| - 10 mg/kg body weight                                                    | 13 (44.8%)               | 0 (20.0%)              |
| <b>Documented<br/>dexamethasone use during<br/>study</b>                  |                          |                        |
| - yes                                                                     | 15 (51.7%)               | 2 (33.3%)              |

|                                                                          |                            |                            |
|--------------------------------------------------------------------------|----------------------------|----------------------------|
| <b>- no</b>                                                              | 14 (48.3%)                 | 4 (66.7%)                  |
| <b>sPD-L1</b>                                                            |                            |                            |
| <b>- Detection rates at baseline</b>                                     | 18 (62.1%)                 | 5 (83.3%)                  |
| <b>- Median (range) of positive samples at baseline [ng/ml]</b>          | 0.2795 (0.057 – 3.383)     | 0.563 (0.127 – 2.245)      |
| <b>- Median number of measurements per patient</b>                       | 6 (2 - 19)                 | 8 (5 - 24)                 |
| <b>Median time to bevacizumab treatment in months (range)</b>            | 15.3 (5.9 – 88.6)          | 37.5 (5.8 – 76.1)          |
| <b>Median overall survival from first diagnosis (months)</b>             | 21.6 (95% CI: 18.7 – 25.1) | 53.2 (95% CI: 35.1 – n.r.) |
| <b>Median overall survival from first bevacizumab treatment (months)</b> | 5.4 (95% CI: 4.5 – 7.2)    | 18.8 (95% CI: 6.7 – n.r.)  |

**Supplementary Table 1. Baseline characteristics according to IDH mutational status available in 31/40 (77.5%) patients**

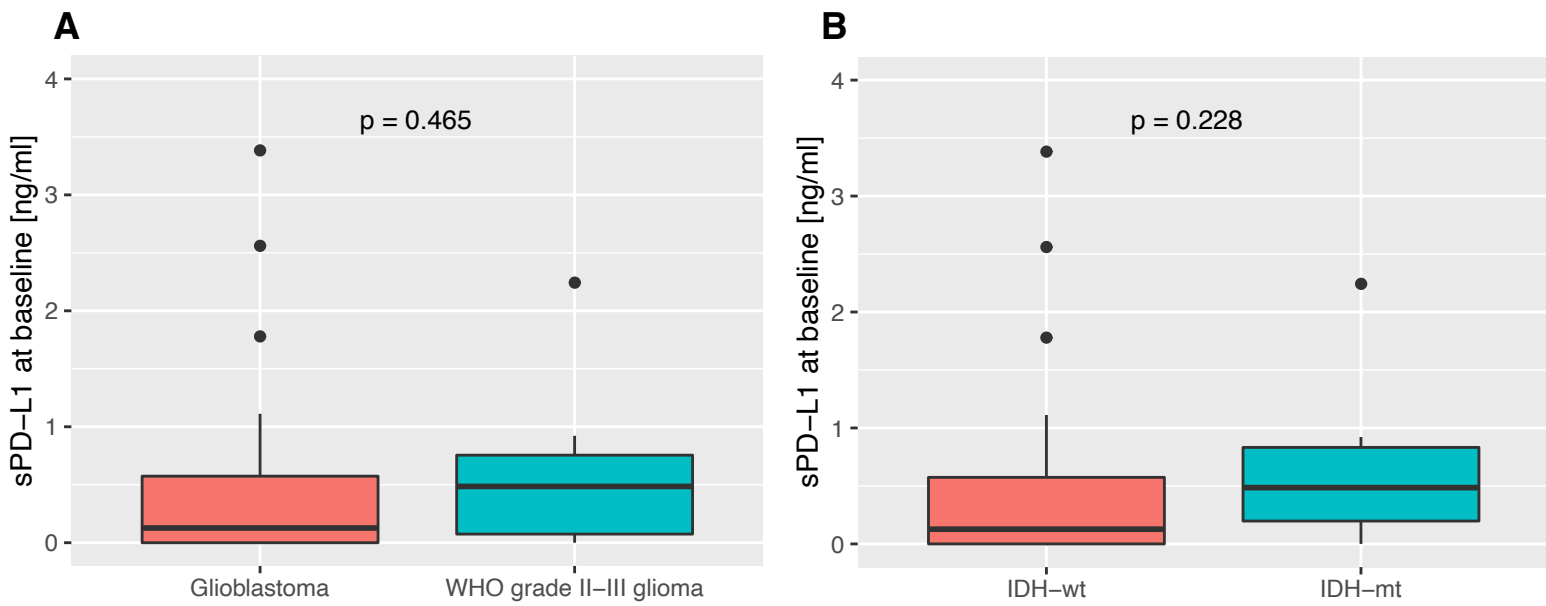

**Supplementary Fig. 1.** sPD-L1 levels at baseline in (A) glioblastoma and WHO grade II-III glioma and (B) IDH-wildtype (IDH-wt) and IDH-mutant (IDH-mt) tumors.

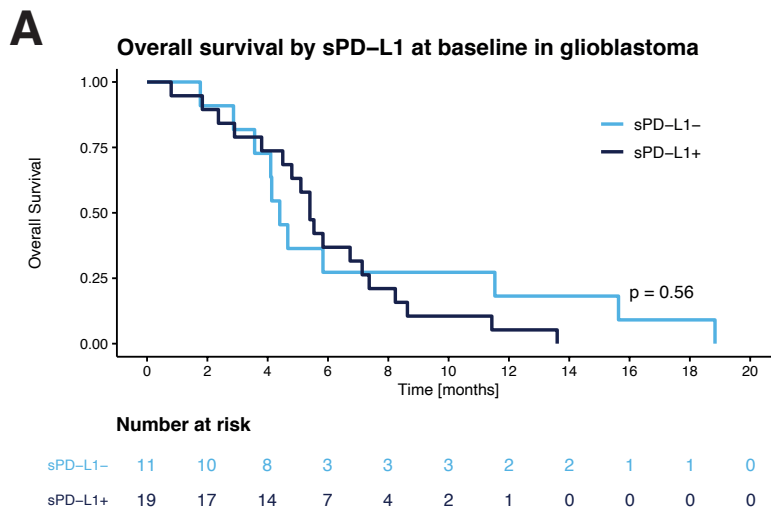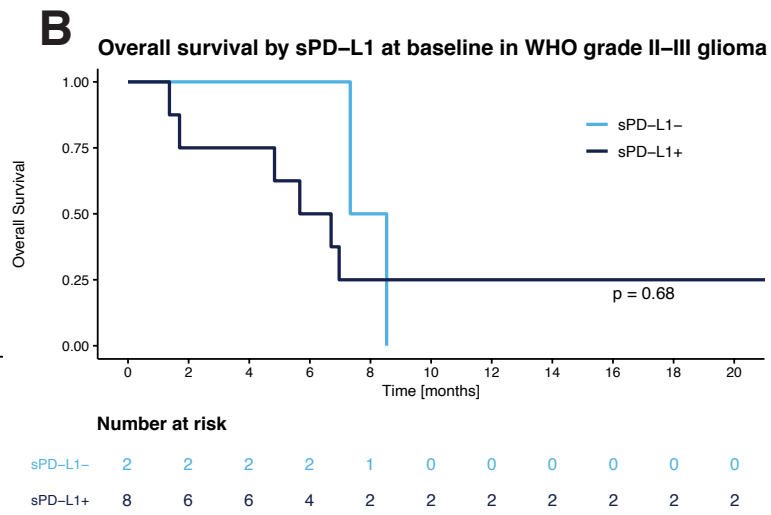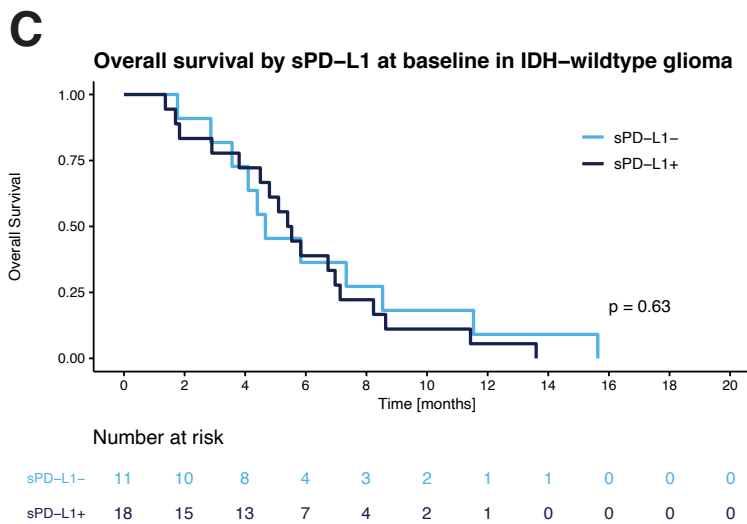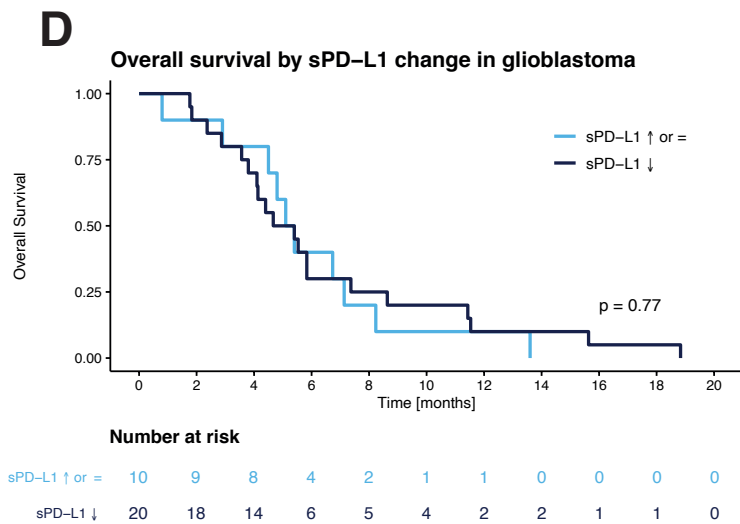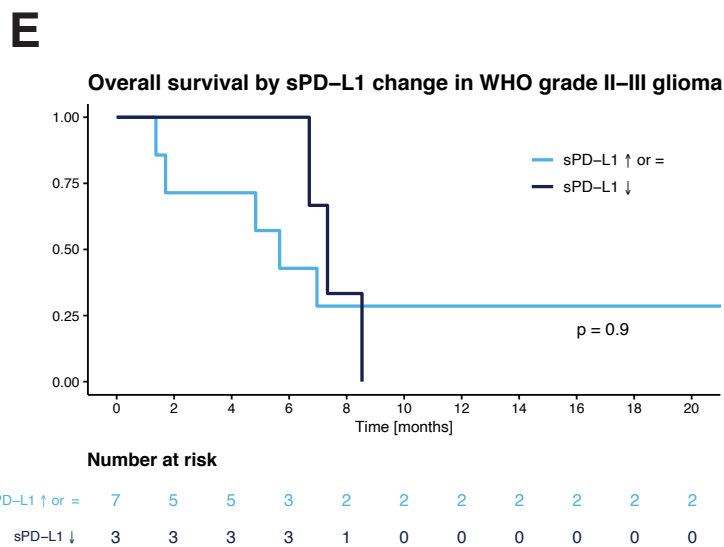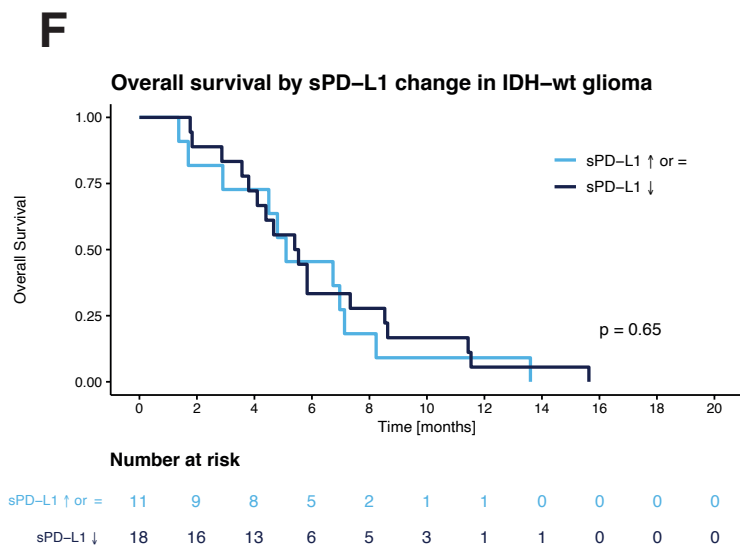

**Supplementary Fig. 2.** Overall survival according to sPD-L1 detectability at baseline in (A) glioblastoma, (B) WHO grade II-III glioma, (C) IDH-wildtype glioma; Overall survival according to sPD-L1 change in (D) glioblastoma, (E) WHO grade II-III glioma, (F) IDH-wildtype glioma.
